# Supplementary material for: Methoxo-bridged diiron(iii) complex of m-xylylenebis(acetylacetonate) showing remarkable thermal stability for encapsulated dichloromethane
Source: Royal Society of Chemistry journal article supplement (doi:10.1039/b818578f), 2009-01-01
Supplement: b818578f.pdf [file b818578f.pdf]

**Electronic Supplementary Information**

**Methoxy-bridged diiron(III) complex of *m*-xylylenebis-(acetylacetonate) showing remarkable thermal stability for encapsulated dichloromethane**

**Supriya Dutta, Papu Biswas, Sujit K. Dutta, and Kamalaksha Nag**

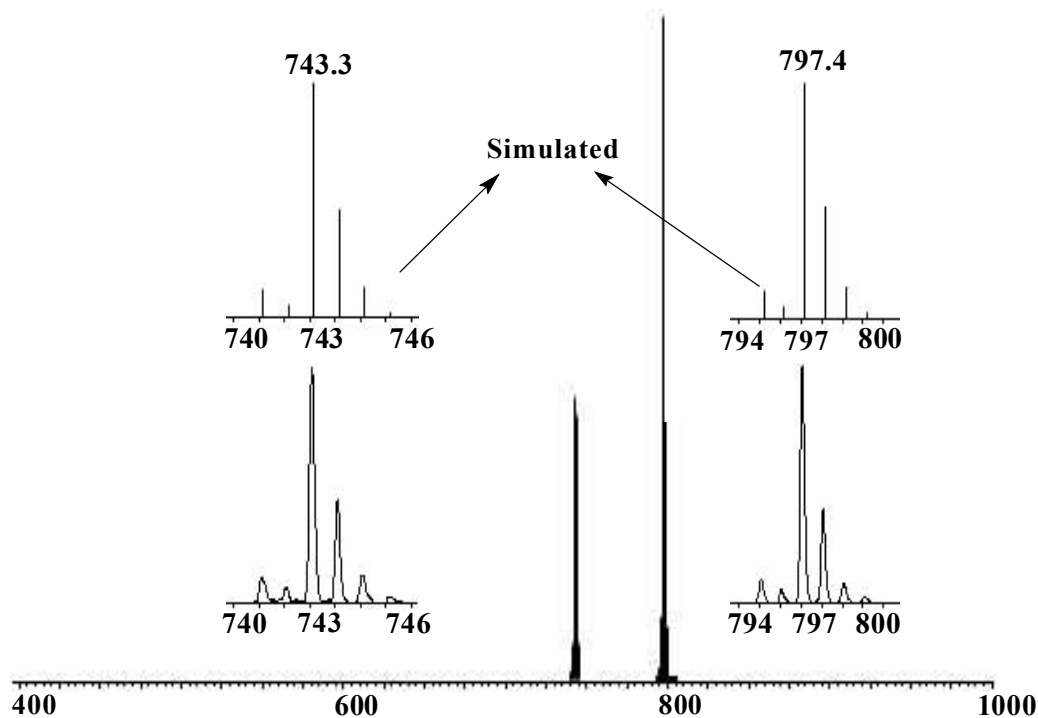

**Fig. S1** Observed and Simulated ESI-MS of  $[\text{Fe}_2(m\text{-xba})_2(\mu\text{-OCH}_3)_2]\cdot\text{CH}_2\text{Cl}_2$  (**1**).

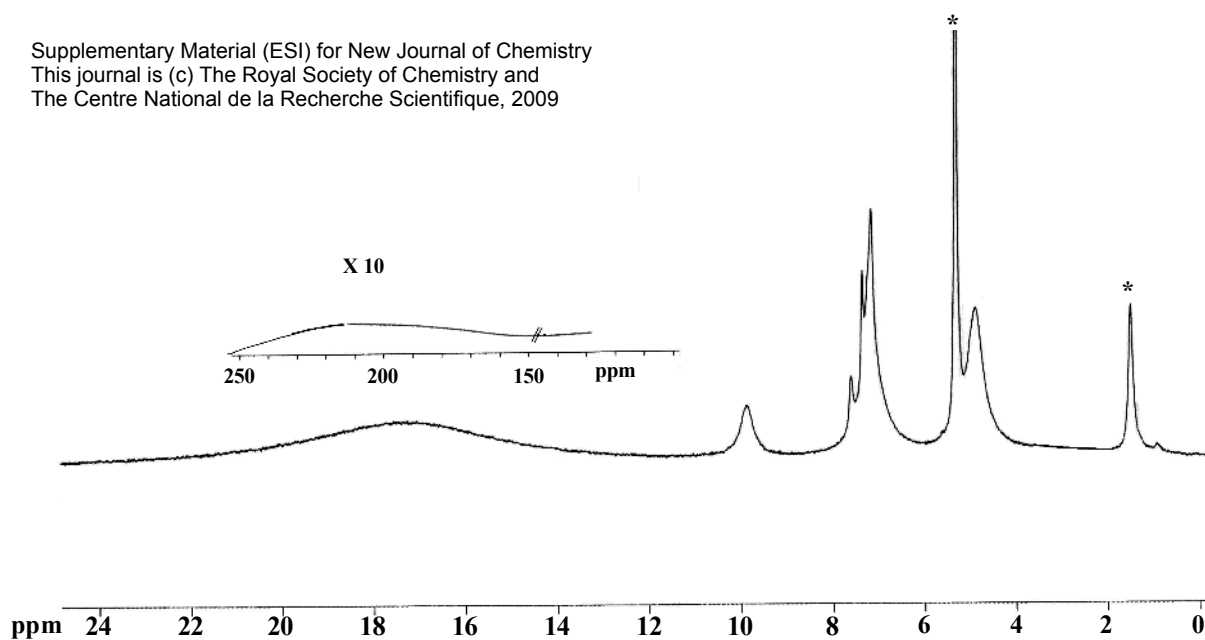

**Fig. S2** Proton NMR spectra of  $[\text{Fe}_2(m\text{-xba})_2(\mu\text{-OCH}_3)_2]\cdot\text{CH}_2\text{Cl}_2$  (**1**) in  $\text{CD}_2\text{Cl}_2$ . Asterisks show peaks due to the solvent.

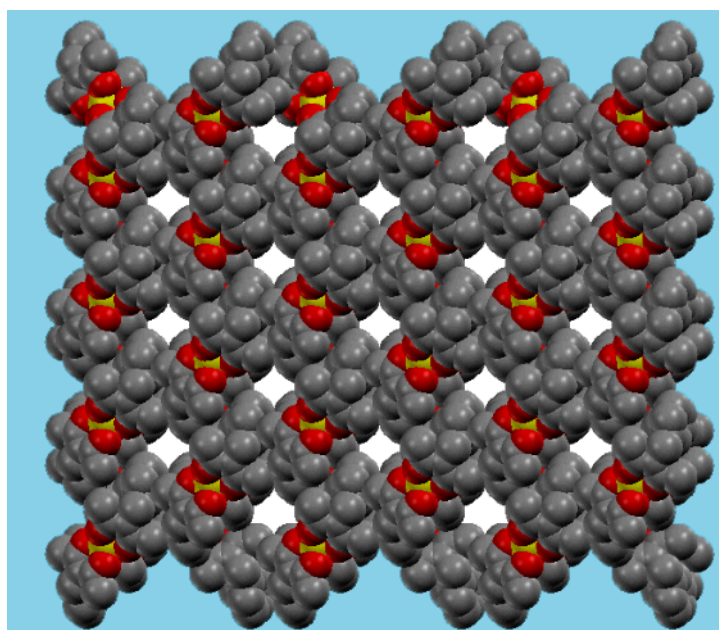

**Fig. S3** Space filling diagram of **1** showing void space after removal of  $\text{CH}_2\text{Cl}_2$ .
